# Supplementary material
Source: publisher figshare collection journal article supplement (https://gsajournals.figshare.com/ndownloader/files/18115898)
Supplement: Supplementary file 1 [file 18115898]

**Appendix file 5**

Strains used in this study

| **Strains** | **Genotype** | **Source** | **Note (Reference)** |
| --- | --- | --- | --- |
| **Strains used for strain construction** | | | |
| BY4741 | *MATa his3Δ1 leu2Δ0 met15Δ0 ura3Δ0* | Thermofisher/Dharmacon | (Brachman*n et* al, 1998) |
| UCC1188 | *MATα his3∆200 trp1(∆901 or ::HIS3) leu2∆1 lys2-801 ura2(-52 or -167) RDN1::URA3 hht1-hhf1::LEU2 ∆hht2-hhf2::HIS3 pMP9 (HHT2-HHF2-LYS2-CEN ARS)* | Daniel E. Gottschling | (Van Leeuwe*n et* al, 2002) |
| Y7092 | *MATα* can1*∆*::STE2pr-Sp_his5 lyp1*∆*his3*∆*1 leu2*∆*0 ura3*∆*0 met15*∆*0 | Charlie Boone | (Tong & Boone, 2007) |
| YDB19 | *MATα can1∆::STE2pr-Sp_his5 lyp1∆his3∆1 leu2∆0 ura3∆0 met15∆0*  *fpr4∆::NATMX4* | This study | From Y7092 |
| YNS3 | *MATa his3Δ1 leu2Δ0 met15Δ0 ura3Δ0 fpr3Δ::KANMX4* | Open Biosystems | (Winzele*r et* al, 1999) |
| YNS5 | *MATa his3Δ1 leu2Δ0 met15Δ0 ura3Δ0 fpr4Δ::KANMX4* | Open Biosystems | (Winzele*r et* al, 1999) |
| YNS6 | *MATa his3Δ1 leu2Δ0 met15Δ0 ura3Δ0 fpr3Δ::URA3 fpr4Δ::NATMX4* | This study | Generated from BY4741 by transformation |
| **Strains used for synthetic genetic array analysis** | | | |
| The MAT a yeast deletion collection | *MATa leu2Δ0 met15Δ0 ura3Δ0 xxxΔ::KANMX4* | Thermofisher Dharmacon | (Winzele*r et* al, 1999) |
| YNS35 | *MATα can1∆::STE2pr-Sp_his5 lyp1∆his3∆1 leu2∆0 ura3∆0 met15∆0*  *fpr4∆::NATMX4 fpr3∆::LEU2 (prs316 FPR4)* | This study | From YDB19 |
| **Strains used for sequencing** | | | |
| BY4741 (YNS1) | *MATa his3Δ1 leu2Δ0 met15Δ0 ura3Δ0* | Open Biosystems | Open Biosystems |
| YNS3 | *MATa his3Δ1 leu2Δ0 met15Δ0 ura3Δ0 fpr3Δ::KANMX4* | Open Biosystems | (Winzele*r et* al, 1999) |
| YNS5 | *MATa his3Δ1 leu2Δ0 met15Δ0 ura3Δ0 fpr4Δ::KANMX4* | Open Biosystems | (Winzele*r et* al, 1999) |
| YNS11 | *MATa his3Δ1 leu2Δ0 met15Δ0 ura3Δ0 fpr3Δ::KANMX4 fpr4Δ::NATMX4* | This study | Generated from DMA FPR3 KO by transformation |
| YNS8 | *MATa his3Δ1 leu2Δ0 met15Δ0 ura3Δ0 sir2Δ::KANMX4* | Thermofisher Dharmacon | (Winzele*r et* al, 1999) |
| **Strains used for propagation assays** | | | |
| UCC1188 | *MATα his3∆200 trp1(∆901 or ::HIS3) leu2∆1 lys2-801 ura2(-52 or -167) RDN1::URA3 hht1-hhf1::LEU2 ∆hht2-hhf2::HIS3 pMP9 (HHT2-HHF2-LYS2-CEN ARS)* | Daniel E. Gottschling | (Van Leeuwe*n et* al, 2002) |
| YNS182 | *MATα his3∆200 trp1(∆901 or ::HIS3) leu2∆1 lys2-801 ura2(-52 or -167) RDN1::URA3 hht1-hhf1::LEU2 ∆hht2-hhf2::HIS3 pMP9 (HHT2-HHF2-LYS2-CEN ARS) sir2Δ::KAN* | This study | Generated from UCC1188 by transformation |
| YNS245 | *MATα his3∆200 trp1(∆901 or ::HIS3) leu2∆1 lys2-801 ura2(-52 or -167) RDN1::URA3 hht1-hhf1::LEU2 ∆hht2-hhf2::HIS3 pMP9 (HHT2-HHF2-LYS2-CEN ARS) fpr3Δ::NAT fpr4Δ::KAN* | This study | Generated from UCC1188 by transformation |

References

Brachmann CB, Davies A, Cost GJ, Caputo E, Li J, Hieter P & Boeke JD (1998) Designer deletion strains derived from Saccharomyces cerevisiae S288C: A useful set of strains and plasmids for PCR-mediated gene disruption and other applications. *Yeast* **14:** 115–132

Van Leeuwen F, Gafken PR & Gottschling DE (2002) Dot1p modulates silencing in yeast by methylation of the nucleosome core. *Cell* **109:** 745–756

Tong AHY & Boone C (2007) High-Throughput Strain Construction and Systematic Synthetic Lethal Screening in Saccharomyces cerevisiae. In *Methods in Microbiology, Volume 36: Yeast Gene Analysis*, Stansfield I & Stark M (eds) pp 369–388. Academic Press Available at: http://linkinghub.elsevier.com/retrieve/pii/S0580951706360163

Winzeler EA, Shoemaker DD, Astromoff A, Liang H, Anderson K, Andre B, Bangham R, Benito R, Boeke JD, Bussey H, Chu AM, Connelly C, Davis K, Dietrich F, Dow SW, El Bakkoury M El, Foury F, Friend SH, Gentalen E, Giaever G, et al (1999) Functional characterization of the S. cerevisiae genome by gene deletion and parallel analysis. *Science* **285:** 901–906 Available at: http://eutils.ncbi.nlm.nih.gov/entrez/eutils/elink.fcgi?dbfrom=pubmed&id=10436161&retmode=ref&cmd=prlinks
